# Supplementary material for: Convergent extension movements in growth plate chondrocytes require gpi-anchored cell surface proteins
Source: Oxford University Press journal article supplement (doi:10.1242/dev.040592), 2009-09-18
Supplement: dev040592tables1.pdf [file dev040592tables1.pdf]

**Table S1. Comparison of phenotypes of mouse mutant cartilage**

| Mouse line                                            | Maturation               | Bone length | Proliferation                                            | Chondrocyte organization | References                                   |
|-------------------------------------------------------|--------------------------|-------------|----------------------------------------------------------|--------------------------|----------------------------------------------|
| Conditional <i>Piga</i> × <i>Hoxb6</i>                | Delay in hypertrophy     | Short       | RZ increased, PZ normal                                  | Disorganized             |                                              |
| <i>Ext</i> <sup>Gt/Gt</sup> (hypomorph)               | Delay in hypertrophy     | Short       | RZ increased, PZ normal                                  | Disorganized             | Koziel et al., 2004                          |
| <i>Ihh</i> <sup>-/-</sup>                             | Delay in hypertrophy     | Short       | Reduced                                                  | Disorganized             | St-Jacques et al., 1999                      |
| <i>Pthrp</i> <sup>-/-</sup>                           | Increased hypertrophy    | Short       | Slightly reduced                                         | Stacked properly?        | Karp et al., 2000                            |
| <i>Ihh</i> <sup>-/-</sup> <i>Pthrp</i> <sup>*</sup>   | Delay in hypertrophy     | Short       | Reduced                                                  | Disorganized?            | Karp et al., 2000                            |
| <i>Ihh</i> <sup>-/-</sup> <i>Pthrp</i> <sup>-/-</sup> | Delay in hypertrophy     | Short       | ?                                                        | Disorganized?            | Karp et al., 2000                            |
| <i>Wnt5a</i> <sup>-/-</sup>                           | Delay in hypertrophy     | Short       | RZ increased, PZ decreased<br>Reduced (binucleate cells) | Stacked properly?        | Yamaguchi et al., 1999;<br>Yang et al., 2003 |
| β1 integrin                                           | Delay in ossification    | Short       |                                                          | Disorganized             | Aszodi et al., 2003                          |
| <i>Rac</i> <sup>fl/fl</sup> *                         | Delay in differentiation | Short       | Reduced                                                  | Disorganized             | Wang et al., 2007<br>Blumbach et al., 2008;  |
| <i>Col9a1</i> <sup>-/-</sup>                          | ?                        | Short       | Reduced<br>Reduced (stated, data not shown)              | Disorganized             | Dreier et al., 2008                          |
| <i>Hspg2</i> <sup>-/-</sup> (perlecan)                | ?                        | Short       |                                                          | Disorganized             | Arikawa-Hirasawa, 1999                       |
| <i>Smad6</i> <sup>*</sup>                             | Delay in hypertrophy     | Short       | Normal                                                   | Stacked properly         | Horiki et al., 2004                          |
| <i>Gpc3</i> <sup>-/+</sup>                            | Delay in hypertrophy     | ?           | Normal                                                   | ?                        | Viviano et al., 2005                         |

\*Activated by collagen II Cre recombinase.

†Figures show high variability in phenotype.
