# Supplementary figures and images for: Convergent extension movements in growth plate chondrocytes require gpi-anchored cell surface proteins
Source: Oxford University Press journal article supplement (doi:10.1242/dev.040592), 2009-09-18

**WT**

**Piga Mut**

**VK  
P0**

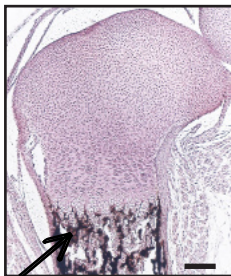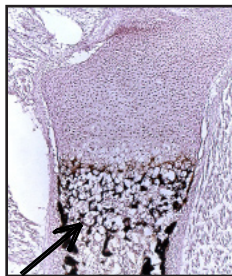

**Col 1  
P0**

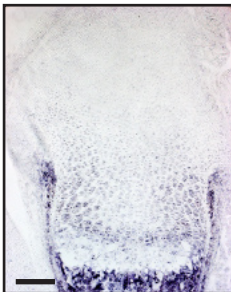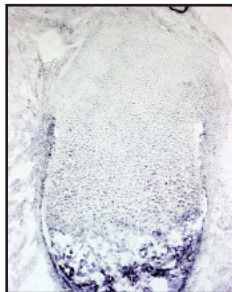

**OC  
P0**

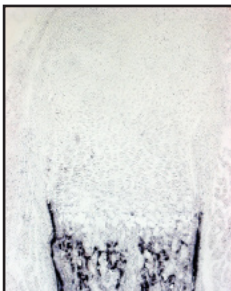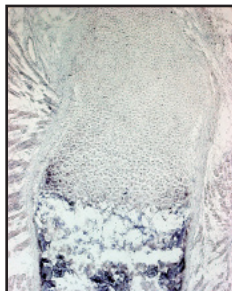

**OPN  
P0**

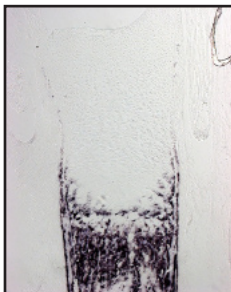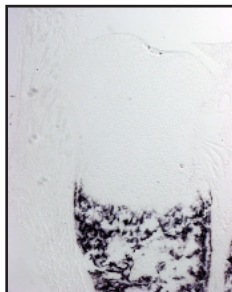

Supplement: dev040592-sup-040592figs1.pdf [file dev040592-sup-040592figs1.pdf]

### WT

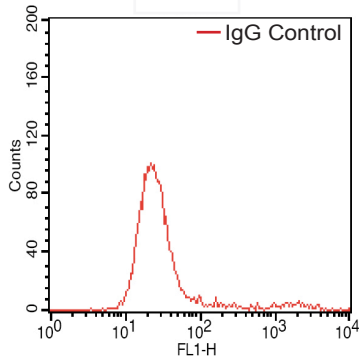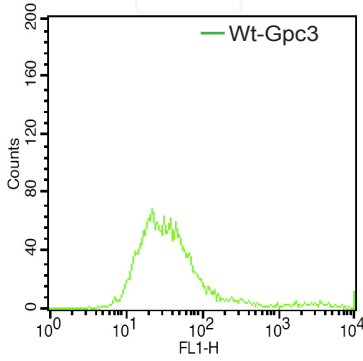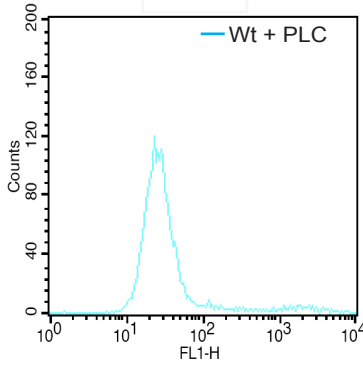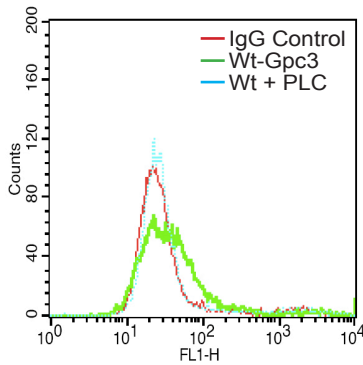

### Piga Mut

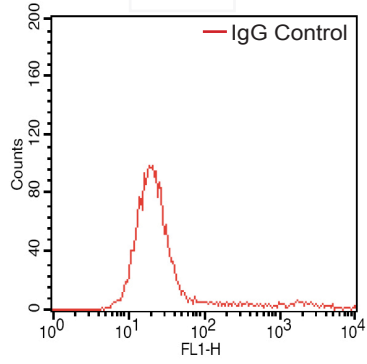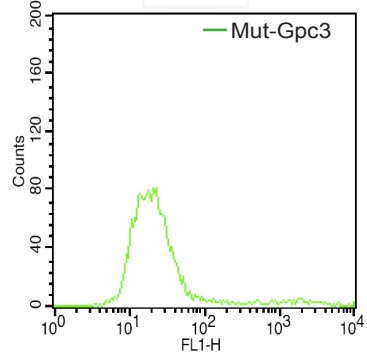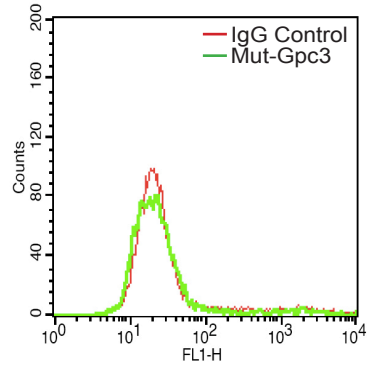

Supplement: dev040592-sup-040592figs2.pdf [file dev040592-sup-040592figs2.pdf]

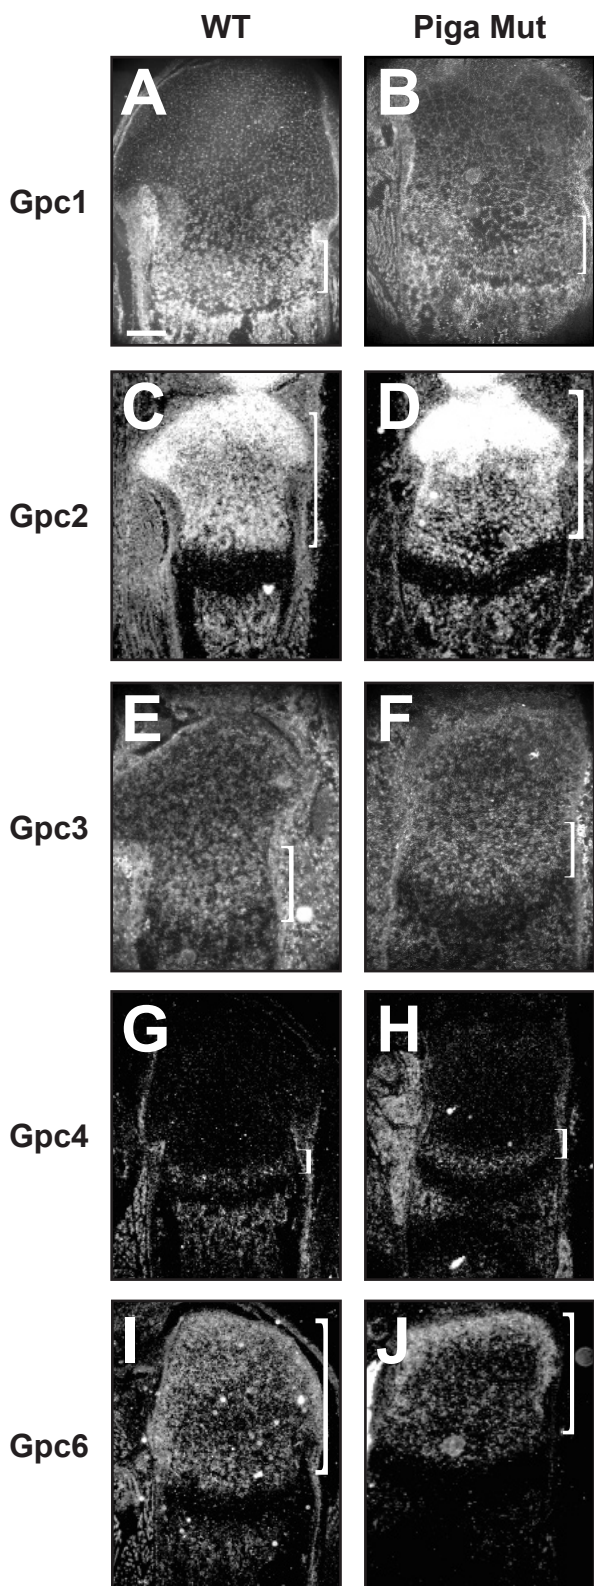

Supplement: dev040592-sup-040592figs3.pdf [file dev040592-sup-040592figs3.pdf]

**Col 9 P0**

**Wt**

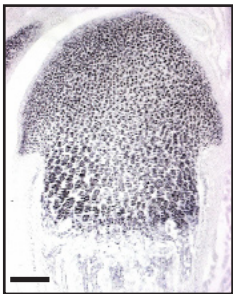

**Piga Mut**

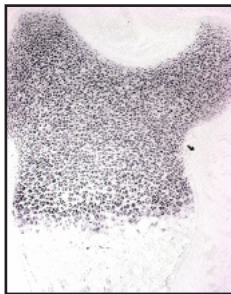

Supplement: dev040592-sup-040592figs4.pdf [file dev040592-sup-040592figs4.pdf]

**WT**

**Piga Mut**

**Phospho-  
Smad 1/5/8**

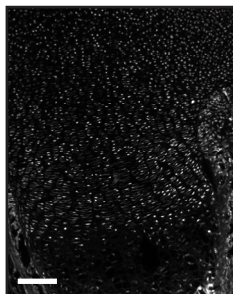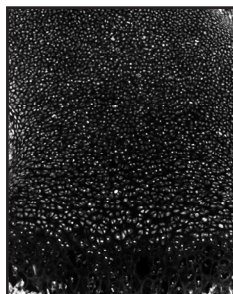

**Phospho-  
p44/42  
MAPK**

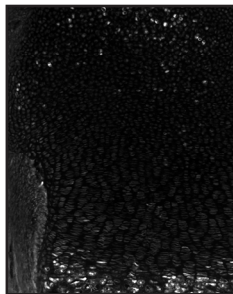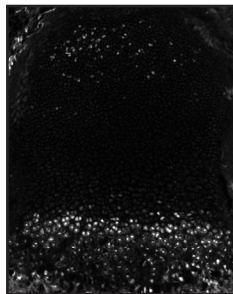

Supplement: dev040592-sup-040592figs5.pdf [file dev040592-sup-040592figs5.pdf]

## $\beta$ -Catenin Cond. KO

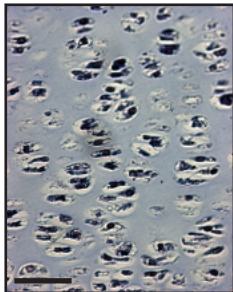

Supplement: dev040592-sup-040592figs6.pdf [file dev040592-sup-040592figs6.pdf]

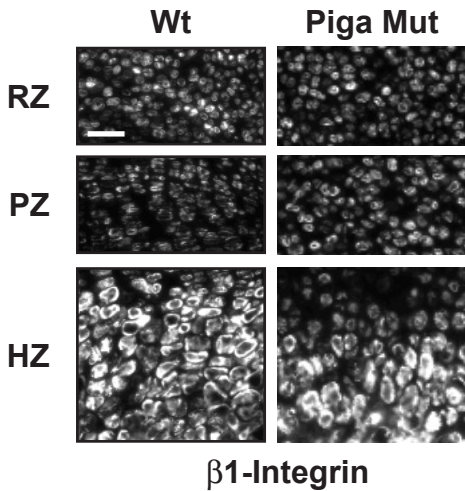

Supplement: dev040592-sup-040592figs7.pdf [file dev040592-sup-040592figs7.pdf]
